# Supplementary material for: Fikrah Dr. Salam: pakaian kena badan anjing
Source: Royal Society of Chemistry journal article supplement (doi:10.1039/c9dt02334h), 2009-12-04
Supplement: c9dt02334h1.pdf [file c9dt02334h1.pdf]

## **Supporting Information**

### **The Novel Strategies about Synthesizing Energetic Materials Based BTO with Satisfactory Performances**

## Table of Contents

|                                                                                                           |     |
|-----------------------------------------------------------------------------------------------------------|-----|
| Experimental Section .....                                                                                | S2  |
| Table S1. Crystal data and structure refinement parameters of <b>2-7</b> .....                            | S5  |
| Table S2. Selected bond lengths [ $\text{\AA}$ ] of <b>2-5</b> .....                                      | S7  |
| Table S3. Selected bond angles [ $^\circ$ ] of <b>2-5</b> .....                                           | S8  |
| Table S4. Selected hydrogen bond angles [ $^\circ$ ] of <b>2-5</b> .....                                  | S9  |
| Table S5. Selected bond lengths [ $\text{\AA}$ ] of <b>6<math>\cdot</math>2H<sub>2</sub>O-7</b> .....     | S10 |
| Table S6. Selected bond angles [ $^\circ$ ] of <b>6<math>\cdot</math>2H<sub>2</sub>O-7</b> .....          | S11 |
| Table S7. Selected hydrogen bond angles [ $^\circ$ ] of <b>6<math>\cdot</math>2H<sub>2</sub>O-7</b> ..... | S12 |
| Heats of formation .....                                                                                  | S13 |
| Reference .....                                                                                           | S14 |

## Experimental Section

**Safety Precautions!** Although we experienced no difficulties in the synthesis and characterization of these materials, small-scale syntheses are strongly encouraged. All of the compounds should be handled with extreme care, and eye protection and gloves must be worn at all times.

**General Methods.** Chemical reagents and solvents were purchased from Aladdin (Shanghai, China) and used as supplied without further purification.  $^1\text{H}$  NMR and  $^{13}\text{C}$  NMR spectra were obtained using a JEOL GSX 600 MHz nuclear magnetic resonance (NMR) spectrometer in a DMSO solution by using tetramethylsilane as an internal standard. Fourier transform infrared (FT-IR) spectra were recorded on a Nicolet-5700 FTIR spectrometer by using pressed KBr pellets to evaluate the chemical bonding of the samples from  $4000\text{ cm}^{-1}$  to  $400\text{ cm}^{-1}$ . Elemental analyses (C, H, and N) were conducted using a Vario EL CUBE device. DSC was performed by a Q200 DSC instrument (TA Instruments, United States) at a heating rate of  $10\text{ }^\circ\text{C min}^{-1}$  in flowing high-purity nitrogen. TGA was performed with an SDT Q600 TGA instrument (TA Instruments, United States) at a heating rate of  $10\text{ }^\circ\text{C min}^{-1}$  in flowing high-purity nitrogen.

### X-ray Crystallography.

The single crystals of **2**- were cultured via a slow solvent evaporation method. Data were collected using a three-circle Bruker platform diffractometer equipped with a SMART APEX II CCD detector. All calculations were performed using the Crystal Structure crystallographic software package except for refinement, which was performed using SHELXL2. [1] Hydrogen atoms were added theoretically and refined with riding model position parameters and fixed isotropic thermal parameters. The details of the data collection and refinement are presented in Table S1.

**Synthesis of 1*H*,1'*H*-5,5'-bistetrazole-1,1'-diolate Dihydrate:** 1*H*,1'*H*-5,5'-bistetrazole-1,1'-diolate dihydrate was synthesized according to a procedure reported in the literature.

**3-amino-1,2,4-triazolium 1*H*,1'*H*-5,5'-bistetrazole-1,1'-diolate (2):** 1*H*,1'*H*-5,5'-bistetrazole-1,1'-diolate dihydrate (206 mg, 1 mmol) was dissolved in a few milliliters of distilled water, and previously added 3-amino-1,2,4-triazole (84.1 mg, 1 mmol). The mixture was heated and filtered. After cooling to room temperature, **2** crystallized as colorless blocks to yield 190.6 mg (0.75 mmol, 75%). DSC ( $10\text{ }^\circ\text{C min}^{-1}$ ):  $261\text{ }^\circ\text{C}$  (dec). IR (KBr)  $\nu/\text{cm}^{-1}$ : 3456, 3319, 3170, 1688, 1568, 1427, 1312, 1262, 954, 863, 769, 714, 496.  $^1\text{H}$  NMR (600 MHz, [D6] DMSO,  $25\text{ }^\circ\text{C}$ )  $\delta/\text{ppm}$ : 8.24.  $^{13}\text{C}$  NMR (150 MHz, [D6] DMSO,  $25\text{ }^\circ\text{C}$ )  $\delta/\text{ppm}$ : 151.89, 140.50, 135.61. Elemental analysis (%) calcd for  $\text{C}_4\text{H}_6\text{N}_{12}\text{O}_2$  (254.21): C 18.90, H 2.38, N 66.13; found: C 18.68, H 2.56, N 66.45. BAM drop hammer:  $>20\text{ J}$ ; friction tester: 252 N.

**Aminoguanidinium 1*H*,1'*H*-5,5'-bistetrazole-1,1'-diolate (3):** 1*H*,1'*H*-5,5'-bistetrazole-1,1'-diolate dihydrate (206 mg, 1 mmol) was dissolved in a few milliliters of distilled water, and

previously added aminoguanidine hemisulfate (123.13 mg, 1 mmol). The mixture was heated and filtered. After cooling to room temperature, **2** crystallized as colorless blocks to yield 190.6 mg (0.75 mmol, 75%). DSC (10 °C min<sup>-1</sup>): 246 °C (dec). IR (KBr)  $\nu$ /cm<sup>-1</sup>: 3435, 3357, 2973, 2916, 1672, 1635, 1477, 1375, 1290, 1090, 993, 762, 712, 625, 512, 444. <sup>1</sup>H NMR (600 MHz, [D6] DMSO, 25 °C)  $\delta$ /ppm: 8.24. <sup>13</sup>C NMR (150 MHz, [D6] DMSO, 25 °C)  $\delta$ /ppm: 151.89, 140.50, 135.61. Elemental analysis (%) calcd for C<sub>3</sub>H<sub>8</sub>N<sub>12</sub>O<sub>2</sub> (244.21): C 14.75, H 3.31, N 68.84; found: C 14.96, H 3.01, N 68.35. BAM drop hammer: >20 J; friction tester: 324 N.

**Diammonium 1*H*,1'*H*-5,5'-bistetrazole-1,1'-diolate (4):** 1*H*,1'*H*-5,5'-bistetrazole-1,1'-diolate dihydrate (206 mg, 1 mmol) was dissolved in a few milliliters of water, and diammonium carbonate (61  $\mu$ L, 1 mmol) was added. After boiling and stirring the mixture for a few minutes, **4** precipitated as thin, colorless plates upon cooling the solution to room temperature, yield 172.1 mg (0.63 mmol, 63%). DSC (10 °C min<sup>-1</sup>): 241 °C (dec). IR (KBr)  $\nu$ /cm<sup>-1</sup>: 3435, 2974, 2897, 1622, 1504, 1425, 1412, 1350, 1232, 1174, 1117, 1047, 1043, 999, 881, 733, 714, 677, 586, 499. <sup>1</sup>H NMR (600 MHz, [D6] DMSO, 25 °C)  $\delta$ /ppm: 9.54. <sup>13</sup>C NMR (150 MHz, [D6] DMSO, 25 °C)  $\delta$ /ppm: 144.48, 135.65. Elemental analysis (%) calcd for C<sub>2</sub>H<sub>6</sub>N<sub>10</sub>O<sub>2</sub> (202.17): C 11.88, H 3.00, N 69.30; found: C 12.10, H 2.79, N 69.68. BAM drop hammer: 15.5 J; friction tester: 144 N.

**Co-crystal of 4-amino-pyrazole and 1*H*,1'*H*-5,5'-bistetrazole-1,1'-diolate (5):** 1*H*,1'*H*-5,5'-bistetrazole-1,1'-diolate dihydrate (206 mg, 1 mmol) and 4-amino-pyrazole (84.08 mg, 1 mmol) were added in a few milliliters of water, and apace dissolved. The mixture was briefly heated to reflux and filtered. After cooling to room temperature, **5** crystallized as colorless needles, yield 204.3 mg (0.81 mmol, 81%). DSC (10 °C min<sup>-1</sup>): 212 °C (dec). IR (KBr)  $\nu$ /cm<sup>-1</sup>: 3417, 3300, 3149, 1662, 1504, 1477, 1410, 1350, 1329, 1286, 1126, 1039, 997, 939, 889, 815, 754, 592, 512. <sup>1</sup>H NMR (600 MHz, [D6] DMSO, 25 °C)  $\delta$ /ppm: 8.55. <sup>13</sup>C NMR (150 MHz, [D6] DMSO, 25 °C)  $\delta$ /ppm: 135.76, 132.81. Elemental analysis (%) calcd for C<sub>3</sub>H<sub>6</sub>N<sub>11</sub>O<sub>2</sub> (252.21): C 23.81, H 2.40, N 61.10; found: C 24.02, H 2.61, N 60.73. BAM drop hammer: >20 J; friction tester: 216 N.

**Co-crystal of 2-methylimidazolium 1*H*,1'*H*-5,5'-bistetrazole-1,1'-diolate and 1*H*,1'*H*-5,5'-bistetrazole-1,1'-diolate (6·2H<sub>2</sub>O):** 2-methylimidazole (82.10 mg, 1 mmol) and 1*H*,1'*H*-5,5'-bistetrazole-1,1'-diolate dihydrate (206 mg, 1 mmol) were added in a few milliliters of water, and apace dissolved. The mixture was briefly heated to reflux and filtered. After cooling to room temperature, **6·2H<sub>2</sub>O** crystallized as colorless needles, yield 204.3 mg (0.81 mmol, 81%). DSC (10 °C min<sup>-1</sup>): 266 °C (dec). IR (KBr)  $\nu$ /cm<sup>-1</sup>: 3429, 3008, 2925, 1622, 1423, 1390, 1375, 1311, 1290, 1250, 1124, 1086, 1047, 989, 924, 881, 784, 714, 656, 517, 457. <sup>1</sup>H NMR (600 MHz, [D6] DMSO, 25 °C)  $\delta$ /ppm: 7.47, 4.36. <sup>13</sup>C NMR (150 MHz, [D6] DMSO, 25 °C)  $\delta$ /ppm: 144.56, 135.55, 119.22, 11.66. Elemental analysis (%) calcd for C<sub>12</sub>H<sub>20</sub>N<sub>20</sub>O<sub>6</sub> (540.48): C 26.67, H 3.74, N 51.84; found: C

26.25, H 3.98, N 51.39. BAM drop hammer: 19 J; friction tester: 120 N.

**Co-crystal of imidazolium 1*H*,1'*H*-5,5'-bistetrazole-1,1'-diolate and 1*H*,1'*H*-5,5'-bistetrazole-1,1'-diolate (7):** 1*H*,1'*H*-5,5'-bistetrazole-1,1'-diolate dihydrate (206 mg, 1 mmol) was dissolved in a few milliliters of water, and imidazole (81.4 mg, 1 mmol) was added. After boiling and stirring the mixture for a few minutes, **7** precipitated and as thin, colorless plates upon cooling the solution to room temperature, yield 172.1 mg (0.63mmol, 63%).DSC (10 °C min<sup>-1</sup>): 256/273 °C (dec). IR (KBr)  $\nu/\text{cm}^{-1}$ : 3433, 2976, 2920, 1635, 1433, 1375, 1311, 1284, 1165, 1083, 1051, 881, 621. <sup>1</sup>H NMR (600 MHz, [D6] DMSO, 25 °C)  $\delta/\text{ppm}$ : 8.57. <sup>13</sup>C NMR (150 MHz, [D6] DMSO, 25 °C)  $\delta/\text{ppm}$ : 144.48, 135.65. Elemental analysis (%) calcd for C<sub>10</sub>H<sub>12</sub>N<sub>20</sub>O<sub>4</sub> (476.40): C 25.21, H 2.54, N 58.82; found: C 25.55, H 2.98, N 58.16. BAM drop hammer: 15 J; friction tester: 168N.

**Table S1.** Crystal data and structure refinement parameters of 2-7

| Compound                     | 2                                                            | 3                                                            | 4                                                            | 5                                                            | 6·2H <sub>2</sub> O                                            | 7                                                              |
|------------------------------|--------------------------------------------------------------|--------------------------------------------------------------|--------------------------------------------------------------|--------------------------------------------------------------|----------------------------------------------------------------|----------------------------------------------------------------|
| Empirical formula            | C <sub>4</sub> H <sub>6</sub> N <sub>12</sub> O <sub>2</sub> | C <sub>3</sub> H <sub>8</sub> N <sub>12</sub> O <sub>2</sub> | C <sub>2</sub> H <sub>6</sub> N <sub>10</sub> O <sub>2</sub> | C <sub>5</sub> H <sub>6</sub> N <sub>11</sub> O <sub>2</sub> | C <sub>12</sub> H <sub>20</sub> N <sub>20</sub> O <sub>6</sub> | C <sub>10</sub> H <sub>12</sub> N <sub>20</sub> O <sub>4</sub> |
| Formula weight               | 254.21                                                       | 244.21                                                       | 202.17                                                       | 252.21                                                       | 540.48                                                         | 476.40                                                         |
| CCDC number                  | 1840941                                                      | 1879814                                                      | 1878638                                                      | 1872564                                                      | 1840856                                                        | 1850642                                                        |
| Crystal size/mm <sup>3</sup> | 0.19×0.18×0.17                                               | 0.17×0.16×0.15                                               | 0.16×0.14×0.12                                               | 0.28×0.18×0.12                                               | 0.19×0.18×0.17                                                 | 0.19×0.18×0.17                                                 |
| Crystal system               | Monoclinic                                                   | Monoclinic                                                   | triclinic                                                    | Monoclinic                                                   | Triclinic                                                      | Triclinic                                                      |
| Space group                  | <i>P</i> 2 <sub>1</sub> / <i>C</i>                           | <i>P</i> 2 <sub>1</sub> / <i>m</i>                           | <i>P</i> $\bar{1}$                                           | <i>C</i> 2/ <i>c</i>                                         | <i>P</i> $\bar{1}$                                             | <i>P</i> $\bar{1}$                                             |
| <i>a</i> [Å]                 | 3.79910(10)                                                  | 7.3674(7)                                                    | 4.7590(13)                                                   | 7.4215(5)                                                    | 3.7719(4)                                                      | 7.2291(7)                                                      |
| <i>b</i> [Å]                 | 12.3968(4)                                                   | 6.5154(6)                                                    | 5.9153(15)                                                   | 9.2025(6)                                                    | 10.4109(10)                                                    | 9.8660(9)                                                      |
| <i>c</i> [Å]                 | 19.5608(6)                                                   | 20.4844(18)                                                  | 6.7057(18)                                                   | 13.7986(9)                                                   | 14.7027(19)                                                    | 13.8595(12)                                                    |
| $\alpha$ [Å]                 | 90                                                           | 90                                                           | 98.682(8)                                                    | 90                                                           | 105.675(10)                                                    | 89.590(7)                                                      |
| $\beta$ [Å]                  | 90.308(3)                                                    | 98.532(2)                                                    | 90.720(8)                                                    | 98.745(2)                                                    | 95.669(9)                                                      | 82.374(7)                                                      |
| $\gamma$ [Å]                 | 90                                                           | 90                                                           | 109.044(7)                                                   | 90                                                           | 98.072(8)                                                      | 68.567(8)                                                      |
| <i>V</i> [Å <sup>3</sup> ]   | 921.24(5)                                                    | 972.40(15)                                                   | 176.01(8)                                                    | 931.44(11)                                                   | 544.69(11)                                                     | 911.08(15)                                                     |
| <i>Z</i>                     | 4                                                            | 4                                                            | 1                                                            | 4                                                            | 1                                                              | 2                                                              |
| <i>T</i> [K]                 | 150                                                          | 293                                                          | 293                                                          | 298                                                          | 150                                                            | 150                                                            |
| $\rho$ [g cm <sup>-3</sup> ] | 1.833                                                        | 1.668                                                        | 1.907                                                        | 1.799                                                        | 1.648                                                          | 1.737                                                          |
| Mu [mm <sup>-1</sup> ]       | 1.323                                                        | 0.140                                                        | 0.163                                                        | 0.147                                                        | 1.171                                                          | 1.226                                                          |

|                             |                      |                      |                    |                      |                      |                      |
|-----------------------------|----------------------|----------------------|--------------------|----------------------|----------------------|----------------------|
| $F$ (000)                   | 520.0                | 504.0                | 104.0              | 516                  | 280.0                | 488.0                |
|                             | $-3 \leq h \leq 4$   | $-8 \leq h \leq 8$   | $-5 \leq h \leq 5$ | $-9 \leq h \leq 9$   | $-4 \leq h \leq 4$   | $-8 \leq h \leq 8$   |
| Index range                 | $-14 \leq k \leq 14$ | $-7 \leq k \leq 7$   | $-7 \leq k \leq 7$ | $-11 \leq k \leq 11$ | $-12 \leq k \leq 12$ | $-10 \leq k \leq 11$ |
|                             | $-23 \leq l \leq 23$ | $-24 \leq l \leq 24$ | $-7 \leq l \leq 7$ | $-17 \leq l \leq 17$ | $-15 \leq l \leq 17$ | $-14 \leq l \leq 16$ |
| Reflections collected       | 2899                 | 9274                 | 2990               | 8078                 | 2586                 | 4783                 |
| $R_{\text{int}}$            | 0.0307               | 0.0485               | 0.0207             | 0.0168               | 0.0637               | 0.0539               |
| Data/Restraints/Parameter   | 1608/0/164           | 1715/3/166           | 608/0/66           | 1066/1/84            | 1862/114/172         | 3126/0/308           |
| s                           |                      |                      |                    |                      |                      |                      |
| GOF on $F^2$                | 1.060                | 1.095                | 1.175              | 1.123                | 1.055                | 1.154                |
| $R_1$ [ $I > 2\sigma(I)$ ]  | 0.0451               | 0.0503               | 0.0256             | 0.0609               | 0.1073               | 0.1475               |
| $wR_2$ [ $I > 2\sigma(I)$ ] | 0.1197               | 0.1102               | 0.0700             | 0.1995               | 0.2296               | 0.3383               |
| $R_1$ (all data)            | 0.0487               | 0.0868               | 0.0259             | 0.0623               | 0.1324               | 0.1536               |
| $wR_2$ (all data)           | 0.1258               | 0.1233               | 0.0703             | 0.2009               | 0.2572               | 0.3408               |
| Largest diff. peak and hole | 0.28/-0.29           | 0.22/-0.31           | 0.24/-0.16         | 0.883/-0.576         | 0.66/-0.77           | 0.71/-0.74           |
| [e $\text{\AA}^{-3}$ ]      |                      |                      |                    |                      |                      |                      |

**Table S2.** Selected bond lengths [ $\text{\AA}$ ] of **2-5**

| Atoms 1-2                 | d (1-2) [ $\text{\AA}$ ] |
|---------------------------|--------------------------|--------------------------|--------------------------|--------------------------|
|                           | <b>2</b>                 | <b>3</b>                 | <b>4</b>                 | <b>5</b>                 |
| <b>O1-N1</b>              | 1.327(2)                 |                          |                          | 1.327(2)                 |
| <b>N1-N2</b>              | 1.332(2)                 |                          | 1.344(15)                | 1.339(3)                 |
| <b>N1-C1</b>              | 1.344(2)                 | 1.318(3)                 | 1.326 (16)               | 1.339(3)                 |
| <b>N2-N3</b>              | 1.317(2)                 | 1.308(3)                 | 1.306 (16)               | 1.302(3)                 |
| <b>N3-N4</b>              | 1.346(2)                 | 1.327(3)                 | 1.336(15)                | 1.345(3)                 |
| <b>N4-C1</b>              | 1.328(2)                 | 1.338(3)                 | 1.343(16)                | 1.328(3)                 |
| <b>N5-N6</b>              | 1.331(2)                 | 1.330(3)                 |                          |                          |
| <b>N5-C2</b>              | 1.344(2)                 | 1.328(3)                 |                          | 1.312(4)                 |
| <b>N6-N7</b>              | 1.303(2)                 | 1.307(3)                 |                          |                          |
| <b>N7-N8</b>              | 1.358(2)                 | 1.330(3)                 |                          |                          |
| <b>N8-C2</b>              | 1.326(2)                 | 1.335(3)                 |                          |                          |
| <b>C1-C2</b>              | 1.437(3)                 | 1.448(3)                 |                          |                          |
| <b>N9-C3</b>              | 1.367(2)                 | 1.317(3)                 |                          |                          |
| <b>N10-C3</b>             | 1.291(2)                 | 1.309(3)                 |                          |                          |
| <b>N11-C4</b>             | 1.328(2)                 |                          |                          |                          |
| <b>N12-C4</b>             | 1.327(2)                 |                          |                          |                          |
| <b>O1-N4</b>              |                          | 1.332(2)                 | 1.320(13)                |                          |
| <b>O2-N8</b>              |                          | 1.325(2)                 |                          |                          |
| <b>N1-C2</b>              |                          | 1.343(3)                 |                          |                          |
| <b>N11 -N12</b>           |                          | 1.392(3)                 |                          |                          |
| <b>N11 -C3</b>            |                          | 1.320(3)                 |                          |                          |
| <b>N5-N5<sup>i</sup></b>  |                          |                          | 1.437(2)                 |                          |
| <b>C1-C1<sup>ii</sup></b> |                          |                          | 1.443(2)                 | 1.440(4)                 |

Symmetry transformations used to generate equivalent atoms:

**i**  $-x+2, -y+1, -z+1$     **ii**  $-x+1, y, -z+3/2$



**Table S3. Selected bond angles [°] of 2-5**

| Atoms 1–2–3             | $\angle$ (1–2–3) [°] | $\angle$ (1–2–3) [°] | $\angle$ (1–2–3) [°] | $\angle$ (1–2–3) [°] |
|-------------------------|----------------------|----------------------|----------------------|----------------------|
|                         | 2                    | 3                    | 4                    | 5                    |
| O1–N1–N2                | 122.5(15)            | 106.2(19)            |                      | 123.3 (18)           |
| O1–N1–C1                | 128.5(16)            |                      |                      | 127.5(18)            |
| N2–N1–C1                | 109.0(16)            |                      | 105.5(10)            | 109.2 (18)           |
| N3–N2–N1                | 105.9(15)            | 111.0(19)            | 111.5(10)            | 105.9(18)            |
| N2–N3–N4                | 111.1(15)            | 105.5(19)            | 105.8(10)            | 111.1(18)            |
| N3–N4–C1                | 105.6(16)            | 109.7(2)             | 108.8(10)            | 106.1(17)            |
| N6–N5–C2                | 109.7(15)            | 105.7(18)            |                      |                      |
| N7–N6–N5                | 106.2(15)            | 111.6(18)            |                      |                      |
| N6–N7–N8                | 110.6(15)            | 105.7(19)            |                      |                      |
| N1–C1–C2                | 124.3(17)            | 127.8(2)             |                      |                      |
| N4–C1–N1                | 108.4(17)            | 107.6(2)             | 108.4(11)            | 107.7(18)            |
| N5–C2–C1                | 126.0(17)            | 127.5(2)             |                      |                      |
| N8–C2–C1                | 126.7(17)            | 124.3(2)             |                      |                      |
| N10–C3–N9               | 112.0(17)            | 121.4(2)             |                      |                      |
| O1–N4–N3                | 122.9(4)             | 123.7(19)            | 121.1(9)             |                      |
| N7–N8–O2                | 122.8(4)             | 122.9(18)            |                      |                      |
| C3–N11–N12              |                      | 119.0(2)             |                      |                      |
| N4–C2–C1                |                      | 124.6(2)             |                      |                      |
| N1–C1–C1 <sup>i</sup>   |                      |                      |                      | 124.2(2)             |
| N4–C1–C1 <sup>i</sup>   |                      |                      |                      | 128.1(2)             |
| N6 <sup>ii</sup> –N6–C3 |                      |                      |                      | 108.0(12)            |
| C3 <sup>ii</sup> –C2–C3 |                      |                      |                      | 104.4(3)             |
| N5–C2–C3 <sup>ii</sup>  |                      |                      |                      | 127.8 (13)           |
| O1–N4–C1                |                      | 126.6(2)             | 130.0(10)            |                      |
| N4–C1–C1 <sup>iii</sup> |                      |                      | 124.1(14)            |                      |
| N1–C1–C1 <sup>iii</sup> |                      |                      | 127.5(13)            |                      |

Symmetry transformations used to generate equivalent atoms:

i -x+2, -y+1, -z+1    ii -x+1, y, -z+3/2    iii -x, 1-y, 1-z

**Table S4. Selected hydrogen bond angles [°] of 2-5**

| Atoms<br>A···H–D* | d(A···<br>H) [Å] |                     | Atoms<br>A···H–D* | d(A···<br>H) [Å] |                      |
|-------------------|------------------|---------------------|-------------------|------------------|----------------------|
| <b>2</b>          |                  |                     | <b>3</b>          |                  |                      |
| O1···H2–O2        | 1.508            | -x+1, y-1/2, -z+3/2 | O2···H1–O1        | 1.548            | x+1, y, z            |
| N1···H2–O2        | 2.293            | -x+1, y-1/2, -z+3/2 | N7···H1–O1        | 2.628            | x+1, y, z            |
| N2···H2–O2        | 2.524            | -x+1, y-1/2, -z+3/2 | N8···H1–O1        | 2.365            | x+1, y, z            |
| N3···H11–N12      | 2.124            | x+1, -y+3/2, z-1/2  | N2···H9A–N9       | 2.218            | 3-x/2, y+1/2, 1-z/2  |
| N3···H12A–N12     | 2.637            | x+1, -y+3/2, z-1/2  | O2···H9B–N9       | 2.505            | x+1/2, -y+3/2, z+1/2 |
| N10···H11–N11     | 2.455            | -x+3, -y+2, -z+1    | N1···H9B–N9       | 2.532            | x+1/2, -y+3/2, z+1/2 |
| N6···H12B–N12     | 2.598            | -x+1, y-1/2, -z+3/2 | N6···H10A–N10     | 2.206            |                      |
|                   |                  |                     | O2···H11–N11      | 2.320            | x+1/2, -y+3/2, z+1/2 |
|                   |                  |                     | N7···H12A–N12     | 2.523            | -x+1, -y+1, -z+1     |
|                   |                  |                     | N1···H12B–N12     | 2.465            | x+1/2, -y+1/2, z+1/2 |
| <b>4</b>          |                  |                     | <b>5</b>          |                  |                      |
| N2···H5A–N5       | 2.053            | x, y, z-1           | N3···H1–O1        | 2.621            | -x+3/2, y-1/2, -z+1  |
| N3···H5A–N5       | 2.657            | -x+1, -y, -z        | N5···H1–O1        | 2.614            | -x+1, -y+1, -z+1     |
| O1···H5B–N5       | 1.875            | x+1, y, z           | N3···H5A–N5       | 2.359            | x-1/2, y+1/2, z      |
| O1···H5C–N5       |                  |                     | N3···H5B–N5       | 2.359            | 3-x/2, y+1/2, 3-z/2  |
| N3···H5C–N5       |                  |                     |                   |                  |                      |

**Table S5.** Selected bond lengths [ $\text{\AA}$ ] of **6·2H<sub>2</sub>O-7**

| Atoms 1–2      | d (1–2) [ $\text{\AA}$ ] | d (1–2) [ $\text{\AA}$ ] | Atoms 1–2                | d (1–2) [ $\text{\AA}$ ] | d (1–2) [ $\text{\AA}$ ] |
|----------------|--------------------------|--------------------------|--------------------------|--------------------------|--------------------------|
|                | <b>6·2H<sub>2</sub>O</b> | <b>7</b>                 |                          | <b>6·2H<sub>2</sub>O</b> | <b>7</b>                 |
| <b>O1–N3</b>   | 1.347(7)                 |                          | <b>N6–C5</b>             | 1.344(8)                 |                          |
| <b>O2–N7</b>   | 1.331(7)                 |                          | <b>N7–N8</b>             | 1.333(8)                 | 1.327(6)                 |
| <b>N1–C2</b>   | 1.343(8)                 |                          | <b>N7–C6</b>             | 1.348(8)                 |                          |
| <b>N1–N4</b>   | 1.377(9)                 |                          | <b>N8–N9</b>             | 1.327(8)                 |                          |
| <b>N2–C2</b>   | 1.342(8)                 |                          | <b>N9–N10</b>            | 1.342(7)                 | 1.322(7)                 |
| <b>N2–C3</b>   | 1.371(9)                 |                          | <b>N10–C6</b>            | 1.337(8)                 |                          |
| <b>N3–C5</b>   | 1.329(8)                 |                          | <b>C1–C2</b>             | 1.472(10)                |                          |
| <b>N3–N4</b>   | 1.337(7)                 | 1.366(7)                 | <b>C3–C4</b>             | 1.346(9)                 |                          |
| <b>N4–N5</b>   | 1.324(8)                 |                          | <b>C5–C5<sup>i</sup></b> | 1.439(12)                |                          |
| <b>N5–N6</b>   | 1.337(8)                 | 1.365(7)                 | <b>C6–C6<sup>i</sup></b> | 1.438(12)                |                          |
| <b>O1–N1</b>   |                          | 1.338(6)                 | <b>N13–N14</b>           |                          | 1.333(7)                 |
| <b>O2–N8</b>   |                          | 1.331(6)                 | <b>N13–C9</b>            |                          | 1.364(7)                 |
| <b>N1–N2</b>   |                          | 1.325(6)                 | <b>N14–N15</b>           |                          | 1.315(7)                 |
| <b>N1–C4</b>   |                          | 1.346(7)                 | <b>N15–N16</b>           |                          | 1.340(7)                 |
| <b>N2–N3</b>   |                          | 1.298(7)                 | <b>N16–C9</b>            |                          | 1.333(8)                 |
| <b>N4–C4</b>   |                          | 1.311(7)                 | <b>C9–C10</b>            |                          | 1.409(8)                 |
| <b>N9–C10</b>  |                          | 1.366(7)                 | <b>N19–C3</b>            |                          | 1.345(8)                 |
| <b>N10–N11</b> |                          | 1.323(8)                 | <b>N20–C1</b>            |                          | 1.332(8)                 |
| <b>N11–N12</b> |                          | 1.343(7)                 | <b>N20–C2</b>            |                          | 1.375(8)                 |
| <b>N12–C10</b> |                          | 1.339(8)                 | <b>C2–C3</b>             |                          | 1.325(8)                 |

**Symmetry transformations used to generate equivalent atoms:****i -x, -y, 2-z****ii 2-x, -y, 1-z**

**Table S6. Selected bond angles [°] of 6·2H<sub>2</sub>O-7**

| Atoms 1–2–3 | $\angle$ (1–2–3) [°]     | $\angle$ (1–2–3) [°] | Atoms 1–2–3             | $\angle$ (1–2–3) [°]     | $\angle$ (1–2–3) [°] |
|-------------|--------------------------|----------------------|-------------------------|--------------------------|----------------------|
|             | <b>6·2H<sub>2</sub>O</b> | <b>7</b>             |                         | <b>6·2H<sub>2</sub>O</b> | <b>7</b>             |
| C2–N1–C4    | 121.8(5)                 |                      | N8–N9–N10               | 111.1(5)                 |                      |
| C2–N2–C3    | 109.7(6)                 |                      | N2–C2–N1                | 106.6(6)                 |                      |
| C5–N3–N4    | 109.5(5)                 |                      | N2–C2–C1                | 126.8(6)                 |                      |
| C5–N3–O1    | 110.5(5)                 |                      | N1–C2–C1                | 126.6(6)                 |                      |
| N4–N3–O1    | 128.2(5)                 |                      | C4–C3–N2                | 107.6(6)                 |                      |
| N5–N4–N3    | 121.3(5)                 |                      | C3–C4–N1                | 106.6(6)                 |                      |
| N4–N5–N6    | 105.2(5)                 |                      | N3–C5–C5 <sup>i</sup>   | 126.5(7)                 |                      |
| N5–N6–C5    | 110.7(5)                 |                      | N6–C5–C5 <sup>i</sup>   | 126.6(7)                 |                      |
| O2–N7–N8    | 106.6(5)                 |                      | N10–C6–C6 <sup>ii</sup> | 128.5(7)                 |                      |
| N9–N8–N7    | 105.3(5)                 |                      | N7–C6–C6 <sup>ii</sup>  | 124.2(7)                 |                      |
| O1–N1–C4    |                          | 128.4(4)             | O4–N13–N14              |                          | 123.0(4)             |
| N3–N2–N1    |                          | 107.0(5)             | N15–N14–N13             |                          | 106.1(5)             |
| N2–N3–N4    |                          | 109.6(4)             | N14–N15–N16             |                          | 110.8(5)             |
| N7–N6–N5    |                          | 128.4(4)             | C9–N16–N15              |                          | 107.2(5)             |
| N6–N7–N8    |                          | 107.0(5)             | N12–C10–C9              |                          | 128.8(5)             |
| N7–N8–O2    |                          | 109.6(4)             | C8–N17–C7               |                          | 110.0(5)             |
| N8–C5–C4    |                          | 125.5(5)             | C6–C7–N17               |                          | 106.7(5)             |
| O3–N9–C10   |                          | 127.1(5)             | N19–C1–N20              |                          | 107.2(5)             |
| N9–N10–N11  |                          | 106.1(5)             | C3–C2–N20               |                          | 107.1(5)             |
| N10–N11–N12 |                          | 110.9(5)             | C2–C3–N19               |                          | 107.6(5)             |

Symmetry transformations used to generate equivalent atoms:

i -x, -y, 2-z

ii 2-x, -y, 1-z

**Table S7. Selected hydrogen bond angles [°] of 6·2H<sub>2</sub>O-7**

| <b>Atoms</b>             | <b>d(A···</b> |                  | <b>Atoms</b>         | <b>d(A···</b> |                  |
|--------------------------|---------------|------------------|----------------------|---------------|------------------|
| <b>A···H-D*</b>          | <b>H) [Å]</b> |                  | <b>A···H-D*</b>      | <b>H) [Å]</b> |                  |
| <b>6·2H<sub>2</sub>O</b> |               |                  | <b>7</b>             |               |                  |
| <b>O1···H1WA-O1W</b>     | 1.793         |                  | <b>N3···H1WB-O1W</b> | 2.591         |                  |
| <b>N3···H1WB-O1W</b>     | 2.591         |                  | <b>O1···H1WA-O1W</b> | 1.793         |                  |
| <b>N4···H1WB-O1W</b>     | 2.208         |                  | <b>N4···H1WB-O1W</b> | 2.208         |                  |
| <b>O1W···H2A-O2</b>      | 2.208         | x+1, y, z        | <b>O1W···H2A-O2</b>  | 2.208         | x+1, y, z        |
| <b>N10···H2A-O2</b>      | 2.318         | -x, -y, -z+1     | <b>N10···H2A-O2</b>  | 2.318         | -x, -y, -z+1     |
| <b>O2···H1-N1</b>        | 1.860         | x-1, y, z        | <b>O2···H1-N1</b>    | 1.860         | x-1, y, z        |
| <b>N7···H1-N1</b>        | 2.592         | x-1, y, z        | <b>N7···H1-N1</b>    | 2.592         | x-1, y, z        |
| <b>O1···H2-N2</b>        | 2.622         | x, y+1, z        | <b>O1···H2-N2</b>    | 2.622         | x, y+1, z        |
| <b>N6···H2-N2</b>        | 2.026         | -x+1, -y+1, -z+2 | <b>N6···H2-N2</b>    | 2.026         | -x+1, -y+1, -z+2 |

## Heats of formation

Calculations were performed with the Gaussian 09 suite of programs.<sup>[2,3]</sup> The geometric optimization of the structures based on single-crystal structures, where available, and frequency analyses were carried out using the B3LYP functional with 6-31+G\*\* basis set, and single energy points were calculated at the MP2/6-311+ +G\*\* level. All of the optimized structures were characterized to be true local energy minima on the potential energy surface without imaginary frequencies. Based on a Born-Haber energy cycle (Scheme S1), the heat of formation of a salt can be simplified by the formula given in Equation (1):

$$\Delta H_f^*(\text{salt}, 298\text{K}) = \Delta H_f^*(\text{cation}, 298\text{K}) + \Delta H_f^*(\text{anion}, 298\text{K}) - \Delta H_L \quad (1)$$

where  $\Delta H_L$  is the lattice energy of the salts, which could be predicted by using the formula suggested by Jenkins et al.<sup>[3,4]</sup> [Eq. (2)]

$$\Delta H_L = U_{\text{pot}} + [p (n_M/2 - 2) + q (n_X/2 - 2)] RT \quad (2)$$

In this equation,  $n_M$  and  $n_X$  depend on the nature of the ions  $M_p^+$  and  $X_q^-$ , respectively, and are equal to three for monoatomic ions, five for linear polyatomic ions, and six for nonlinear polyatomic ions. The equation for lattice potential energy  $U_{\text{pot}}$  [Eq. (3)] has the form:

$$U_{\text{pot}} [\text{kJ mol}^{-1}] = \gamma (\rho_m/M_m)^{1/3} + \delta \quad (3)$$

Where  $\rho_m$  [ $\text{g cm}^{-3}$ ] is the density,  $M_m$  is the chemical formula mass of the ionic material, and values for  $\gamma$  and the coefficients  $\gamma$  ( $\text{kJ mol}^{-1} \text{cm}$ ) and  $\delta$  ( $\text{kJ mol}^{-1}$ ) are taken from the literature.<sup>[5]</sup>

The heat of formation of a cocrystal can be simplified by the formula given in Equation (4):

$$\Delta H_f^*(\text{cocrystal}, 298\text{K}) = \Delta H_f^*(\text{molecule}, 298\text{K}) + \Delta H_f^*(\text{cation}, 298\text{K}) + \Delta H_f^*(\text{anion}, 298\text{K}) - \Delta H_L \quad (4)$$

where  $\Delta H_L$  is the lattice energy of the cocrystals, which could be predicted by using Equation (5)<sup>[4]</sup>:

$$\Delta H_L = (232.8/\sqrt[3]{V}) + 110 \quad (5)$$

Where  $V$  is the molecular volume, calculated by multiwfn<sup>[6]</sup>.

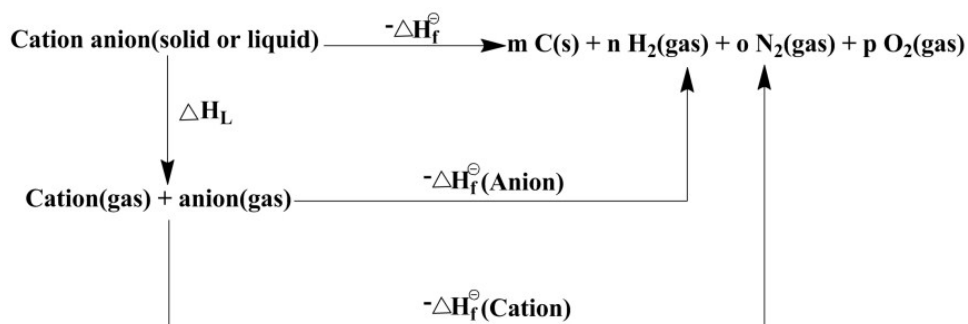

**Scheme S1.** Born-Haber cycle for the formation of Energetic salts.

If the compound contains a molecule of water, the heat of formation for the compound is calculated by

addition of  $\Delta H_f^*$ (s, 298 K) for H<sub>2</sub>O, which is -311 kJ mol<sup>-1</sup>.

## Reference

- [1] Bruker. APEX2 v2010.3-0. Bruker AXS Inc. Madison, Wisconsin, USA. 2010
- [2] M. Frisch, G. Trucks, H. Schlegel, G. Scuseria, M. Robb, J. Cheeseman, J. Montgomery J. T. Vreven, K. Kudin and J. Burant, *Gaussian Inc., Wallingford, CT*, 2004, 26.
- [3] Frisch, M. J. et al., Gaussian 09, Revision D. 01, Gaussian Inc., Wallingford C T, 2009.
- [4] H. Donald B. Jenkins, Helen K. Roobottom, Jack Passmore, Leslie Glasser, *Inorg. Chem.* 1999, 38, 3609-3620.
- [5] H. D. B. Jenkins, D. Tudela, Glasser, L. *Inorg. Chem.* 2002, 41, 2364–2367.
- [6] T. Lu, F. Chen, *J. Comput. Chem.* 2012, 33, 580–592.
